# Supplementary figures and images for: A Privacy-Preserving Symptoms Retrieval System with the Aid of Homomorphic Encryption and Private Set Intersection Schemes
Source: MDPI journal article supplement (doi:10.3390/a16050244), 2023-05-09

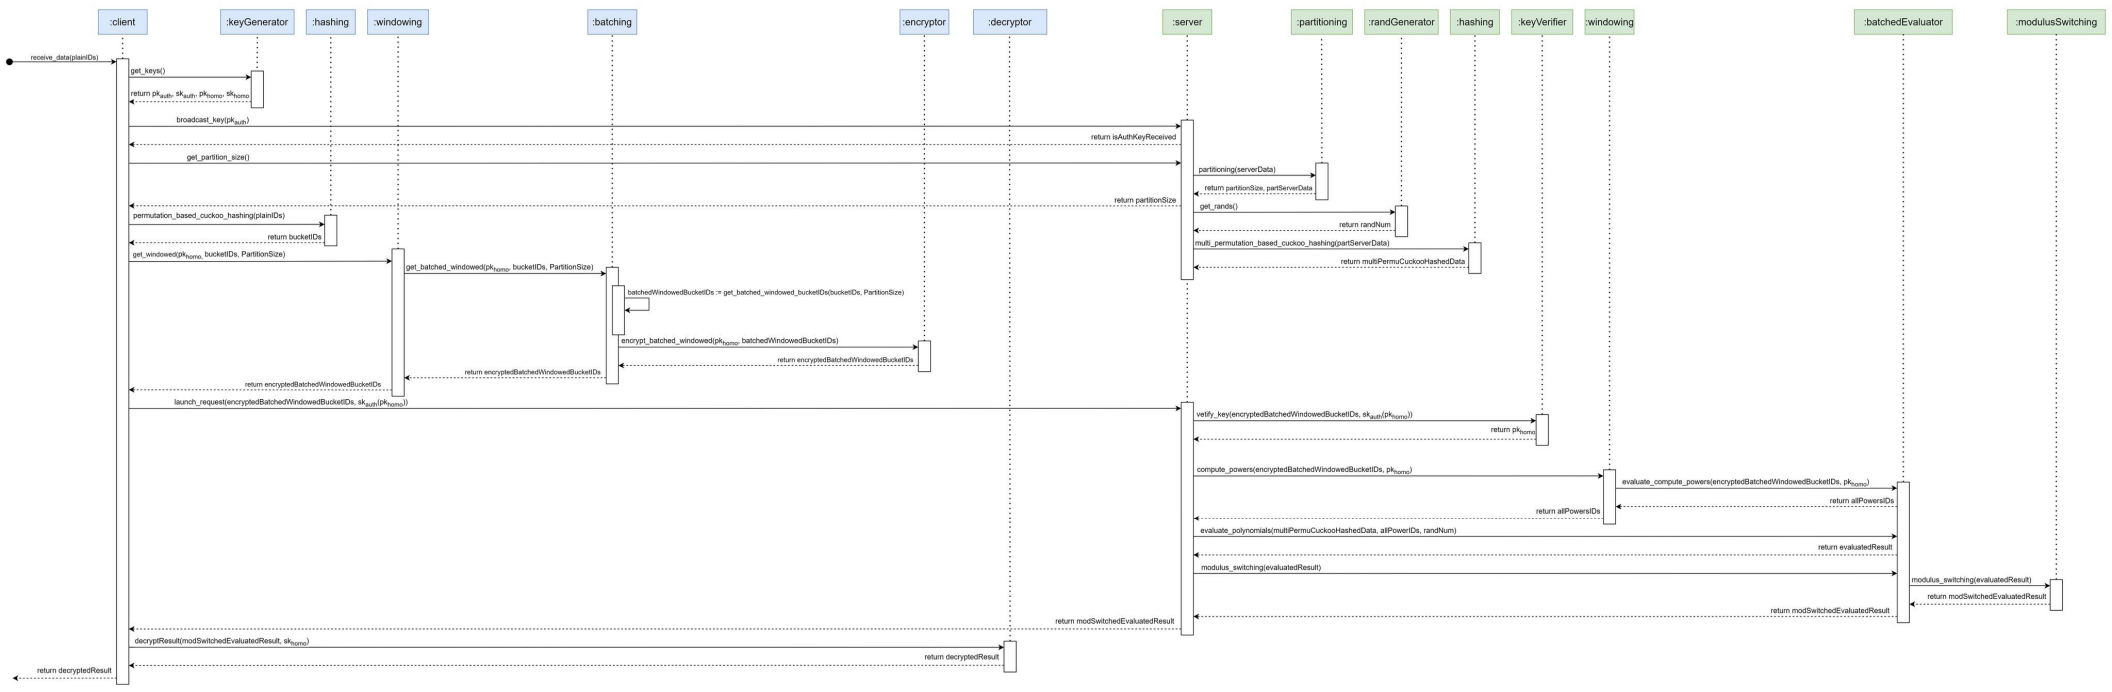

Supplement: s1 [file s1]
